# Supplementary material for: Maize Plant Resilience to N Stress and Post-silking N Capacity Changes over Time: A Review
Source: PubMed Central journal article supplement (PMC4746326; doi:10.3389/fpls.2016.00053), 2016-02-09
Supplement: Table1.pdf [file Table1.pdf]

**Supplementary Table 1**

Published references used in compilation of synthesized data set. Listed by primary author, year(s) study was conducted, N rate(s) applied (kg ha<sup>-1</sup>), plant density (PD) (plant m<sup>-2</sup>), and country where research was conducted.

| No. | Author            | Year Study was Conducted | N rate (kg ha <sup>-1</sup> ) | PD (plant m <sup>-2</sup> ) | Country   |
|-----|-------------------|--------------------------|-------------------------------|-----------------------------|-----------|
| 1   | Akintoye et al.   | 1991, 1992               | 0, 70, 140, 210               | 5.3                         | Nigeria   |
| 2   | Anderson et al.   | Ex. A: 1980, 1981        | 56, 112, 168, 224             | 2.3, 3.4                    | USA       |
|     |                   | Ex. B: 1979, 1980        | 56, 224                       | 2.3                         | USA       |
| 3   | Antonietta et al. | 2008, 2009, 2010         | 100, 120                      | 6.0, 7.0, 8.0, 9.0, 10.0    | Argentina |
| 4   | Barber et al.     | 1987, 1988, 1989         | 336                           | 7.3, 7.1                    | USA       |
| 5   | Beauchamp et al.  | 1971                     | 145                           | 4.4                         | Canada    |
| 6   | Bender et al.     | 2010                     | 202                           | 8.4                         | USA       |
| 7   | Bigeriego et al.  | 1976                     | 0                             | 7.0                         | USA       |
| 8   | Boyer             | 2007, 2008               | 168                           | 4.0, 5.4, 6.4, 7.4, 8.4     | USA       |
| 9   | Bundy et al.      | 1985, 1986               | 0, 78, 157, 235,              | 2.5, 2.7                    | USA       |
| 10  | Chen et al.       | 2012, 2013               | 55, 220                       | 5.4, 7.9, 10.4              | USA       |
| 11  | Chen et al.       | 2010, 2011, 2012, 2013   | 60, 120, 180, 240             | 6.0                         | China     |
| 12  | Chen et al.       | 2010, 2011               | 240                           | 6.0                         | China     |
| 13  | Chen et al.       | 2010, 2011               | 0, 120, 240                   | 6.0                         | China     |
| 14  | Cimapitti et al.  | 2010, 2011               | 0, 112, 224                   | 5.4, 7.9, 10.4              | USA       |
| 15  | Ciampitti et al.  | 2009                     | 0, 165, 330                   | 5.4, 7.9, 10.4              | USA       |
| 16  | Cirilo et al.     | 2003, 2004               | 0, 250                        | 8.0                         | Argentina |
| 17  | Coque et al.      | 2002, 2003               | 90, 200                       | 10.0                        | France    |
| 18  | Cui et al.        | 2010, 2011               | 300                           | 6.8                         | China     |
| 19  | Cui et al.        | 2011                     | 225, 450                      | 8.8                         | China     |
| 20  | De Oliveira Silva | 2012, 2013               | 0, 112                        | 8.0                         | USA       |
| 21  | Di Fonzo et al.   | 1978, 1979               | 100, 350                      | 5.9                         | Italy     |
| 22  | Eghball et al.    | 1989                     | 0, 60, 120, 180               | 5.3                         | USA       |
| 23  | Gentinetta et al. | 1982                     | 300                           | 6.0                         | Italy     |
| 24  | Goodroad et al.   | 1983, 1984               | 30, 110, 190, 350             | 6.6                         | USA       |
| 25  | Grzebisz et al.   | 2001, 2002, 2003         | 135                           | Not Reported                | Poland    |
| 26  | Hanway            | 1959                     | 0, 44, 88, 176                | 4.3                         | USA       |
| 27  | Hay et al.        | 1945                     | 0                             | 4.3                         | USA       |
| 28  | He et al.         | 2000                     | 0, 250, 400                   | 6.0                         | China     |

|    |                   |                                  |                                       |                      |                |
|----|-------------------|----------------------------------|---------------------------------------|----------------------|----------------|
| 29 | Hou et al.        | Ex. A: 2007, 2008<br>Ex. B: 2009 | 0, 209, 225, 450<br>225               | 6.6, 8.9, 9.0<br>6.5 | China<br>China |
| 30 | Jin et al.        | 2010, 2011                       | 0, 126, 160,<br>185, 225, 300,<br>450 | 6.0, 7.5, 8.7        | China          |
| 31 | Jing et al.       | 2009, 2010                       | 0, 360, 405,<br>450, 495, 540         | 8.3                  | China          |
| 32 | Johnson et al.    | 1962, 1964                       | 124                                   | 6.3                  | USA            |
| 33 | Jones et al.      | 1903                             | Not reported                          | 2.5                  | USA            |
| 34 | Kamprath et al.   | Not reported                     | 56, 168, 280                          | 3.7                  | USA            |
| 35 | Karlen et al.     | 1980, 1982                       | 250, 268                              | 7.0, 10.0            | USA            |
| 36 | Karlen et al.     | 1985                             | 560                                   | 11.2                 | USA            |
| 37 | Kosgey et al.     | 2008, 2009                       | 0, 50, 150, 200,<br>270               | 10.0                 | New Zealand    |
| 38 | Kovács            | 2010, 2011, 2012                 | 0, 90, 145, 202                       | 8.5                  | USA            |
| 39 | Lafitte et al.    | 1989, 1990, 1991                 | 0, 200                                | 5.3                  | Mexico         |
| 40 | Lemcoff et al.    | Not reported                     | 0, 167                                | 3.6, 7.3             | USA            |
| 41 | Li et al.         | 2007, 2008                       | Not reported                          | 5.2, 7.5             | China          |
| 42 | Liu et al.        | 2009, 2010, 2011                 | 0, 100, 200,<br>250, 300, 400         | 8.5                  | China          |
| 43 | Lü et al.         | 2008, 2009                       | 0, 100                                | 7.5                  | China          |
| 44 | Ma et al.         | 1993, 1994, 1995                 | 0, 42, 59, 100                        | 5.8                  | Canada         |
| 45 | Martin et al.     | 2002                             | 170                                   | 9.9                  | France         |
| 46 | Mi et al.         | 1996, 1997                       | 45, 225                               | 6.0                  | China          |
| 47 | Miller            | 2010, 2011                       | 0, 45, 90, 135,<br>180, 225           | 8.2                  | USA            |
| 48 | Moll et al.       | 1978                             | 56, 224                               | 2.5                  | USA            |
| 49 | Moll et al.       | 1990, 1991                       | 56, 140, 224                          | 3.4                  | USA            |
| 50 | Montemurro et al. | 2000, 2001, 2002                 | 0, 100, 200                           | 6.7                  | Italy          |
| 51 | Muchow            | 1986                             | 0, 60, 120, 240,<br>420               | 7.0                  | Australia      |
| 52 | Ning et al.       | 2009, 2010                       | 200                                   | 6.0                  | China          |
| 53 | Oikeh et al.      | 1993, 1994                       | 0, 30, 90, 120                        | 5.3                  | Nigeria        |
| 54 | Osaki             | 1982, 1984                       | 0, 100, 150, 300                      | 5.3, 11.1            | Mexico         |
| 55 | Osaki et al.      | 1988                             | 100                                   | 5.6                  | Japan          |
| 56 | Pan et al.        | 1981, 1982                       | 56, 224                               | 3.4                  | USA            |
| 57 | Pan et al.        | 1983, 1984                       | 275, 308, 411                         | 3.4, 4.5             | USA            |
| 58 | Peng et al.       | 2005                             | 150                                   | 6.0                  | China          |
| 59 | Peng et al.       | 2007, 2008, 2009                 | 0, 230, 250,<br>395, 450              | 10.0                 | China          |
| 60 | Pommel et al.     | 2001, 2002                       | 30, 170                               | Not Reported         | France         |
| 61 | Qi et al.         | 2010, 2011                       | 466                                   | 7.5                  | China          |

|    |                    |                  |                                 |               |                    |
|----|--------------------|------------------|---------------------------------|---------------|--------------------|
| 62 | Rajcan et al.      | 1993, 1994, 1995 | 0, 150                          | 7.3           | Canada             |
| 63 | Reed et al.        | 1978             | 200                             | 4.6           | USA                |
| 64 | Ren et al.         | 2011, 2012       | 300                             | 6.8           | China              |
| 65 | Sayre              | 1940             | Not reported                    | 2.7           | USA                |
| 66 | Subedi et al.      | 2003, 2004       | 0, 150                          | 7.5           | Canada             |
| 67 | Swank et al.       | 1981             | 0, 12                           | 5.9           | USA                |
| 68 | Ta et al.          | 1989             | 67, 257                         | 6.0           | USA                |
| 69 | Tsai et al.        | 1986, 1987       | 268                             | 5.3           | USA                |
| 70 | Tsai et al.        | 1979, 1980       | 0, 201, 447                     | 5.4           | USA                |
| 71 | Tsai et al.        | 1986, 1987       | 67, 134, 268                    | 5.5           | USA                |
| 72 | Uribelarrea et al. | 2001, 2002, 2003 | 0, 34, 68, 102, 170, 204, 238   | 6.5           | USA                |
| 73 | Wang et al.        | 2010             | 492                             | 6.0           | China              |
| 74 | Wang et al.        | 2007             | 0, 300                          | 7.5           | China              |
| 75 | Wang et al.        | 2010, 2011       | 200, 247, 300, 474              | 6.0, 7.5, 8.3 | China              |
| 76 | Wang et al.        | 2011, 2012       | 0, 120, 240                     | 5.0           | China              |
| 77 | Wolfe et al.       | 1983             | 0, 180                          | 7.0           | USA                |
| 78 | Worku et al.       | 2003, 2004       | 0, 18, 90, 168                  | 5.3           | Zimbabwe,<br>Kenya |
| 79 | Xiao et al.        | Not reported     | 225                             | 8.4           | China              |
| 80 | Yan et al.         | 2010, 2011       | 0, 30, 45, 56, 92, 250          | 7.1, 7.5, 7.6 | China              |
| 81 | Yibrin et al.      | 1992, 1993       | 0, 340                          | 7.7           | USA                |
| 82 | Zhan et al.        | 2009             | 0, 195, 240, 280                | Not Reported  | China              |
| 83 | Zhang et al.       | 2010, 2011       | 0, 225                          | 6.7           | China              |
| 84 | Zhao et al.        | 2005, 2006       | 0, 357, 417, 626, 360, 714, 834 | 6.0           | China              |

## Supplementary Table 2

Full citations of references used in compilation of synthesized data set.

| No. | Citation                                                                                                                                                                                                                                                                       |
|-----|--------------------------------------------------------------------------------------------------------------------------------------------------------------------------------------------------------------------------------------------------------------------------------|
| 1   | Akintoye, H.A., E.O. Lucas, and J.G. Kling. 1999. Grain yield and yield components of single, double, and synthetic maize lines grown at four N levels in three ecological zones of West Africa. <i>Trop. Agric.</i> 76(1): 51–56.                                             |
| 2   | Anderson, E.L., E.J. Kamprath, and R.H. Moll. 1985. Prolificacy and N fertilizer effects on yield and N utilization in maize. <i>Crop Sci.</i> 25(4): 598.                                                                                                                     |
| 3   | Antonietta, M., D.D. Fanello, H.A. Acciaresi, and J.J. Guiamet. 2014. Senescence and yield responses to plant density in stay green and earlier-senescing maize hybrids from Argentina. <i>F. Crop. Res.</i> 155: 111-119.                                                     |
| 4   | Barber, K.L., L.D. Maddux, G.M. Pierzynski, D.E. Kissel, and B.R. Bock. 1992. Corn responses to ammonium- and nitrate-nitrogen fertilization. <i>Soil Sci. Soc. Am. J.</i> 56(4): 1166.                                                                                        |
| 5   | Beauchamp, E.G., L.W. Kannenberg, and R.B. Hunter. 1976. Nitrogen accumulation and translocation in corn genotypes following silking. <i>Agron. J.</i> 68(2): 418.                                                                                                             |
| 6   | Bender, R.R., J.W. Haegele, M.L. Ruffo, and F.E. Below. 2013. Nutrient uptake, partitioning, and remobilization in modern, transgenic insect-protected maize hybrids. <i>Agron. J.</i> 105: 161–170.                                                                           |
| 7   | Bigeriego, M., R.D. Hauck, and R. a. Olson. 1979. Uptake, Translocation and Utilization of 15N-Depleted Fertilizer in Irrigated Corn. <i>Soil Sci. Soc. Am. J.</i> 43(3): 528.                                                                                                 |
| 8   | Boyer, M.J. 2013. Dry matter and nutrient accumulation in corn hybrids from the 1960's to 2000's. M.S. Thesis. Iowa State University.                                                                                                                                          |
| 9   | Bundy, L.G., and P.R. Carter. 1988. Corn hybrid response to nitrogen fertilization in the Northern Corn Belt. <i>J. Prod. Agric.</i> 1(2): 99.                                                                                                                                 |
| 10  | Chen, K., S. V. Kumudini, M. Tollenaar, and T.J. Vyn. 2015a. Plant biomass and nitrogen partitioning changes between silking and maturity in newer versus older maize hybrids. <i>F. Crop. Res.</i> 183: 315–328.                                                              |
| 11  | Chen, Y., C. Xiao, D. Wu, T. Xia, Q. Chen, F. Chen, L. Yuan, and G. Mi. 2015b. Effects of nitrogen application rate on grain yield and grain nitrogen concentration in two maize hybrids with contrasting nitrogen remobilization efficiency. <i>Eur. J. Agron.</i> 62: 79–89. |
| 12  | Chen, Y., C. Xiao, X. Chen, Q. Li, J. Zhang, F. Chen, L. Yuan, and G. Mi. 2014. Characterization of the plant traits contributed to high grain yield and high grain nitrogen concentration in maize. <i>F. Crop. Res.</i> 159: 1–9.                                            |
| 13  | Chen, X., F. Chen, Y. Chen, Q. Gao, X. Yang, L. Yuan, F. Zhang, and G. Mi. 2013. Modern maize hybrids in Northeast China exhibit increased yield potential and resource use efficiency despite adverse climate change. <i>Glob. Chang. Biol.</i> 19(3): 923–936.               |
| 14  | Ciampitti, I.A., S.T. Murrell, J.J. Camberato, M. Tuinstra, Y. Xia, P. Friedemann, and                                                                                                                                                                                         |

- T.J. Vyn. 2013. Physiological dynamics of maize nitrogen uptake and partitioning in response to plant density and nitrogen stress factors: II. Reproductive phase. *Crop Sci.* 53: 2588–2602.
- 15 Ciampitti, I.A., and T.J. Vyn. 2011. A comprehensive study of plant density consequences on nitrogen uptake dynamics of maize plants from vegetative to reproductive stages. *F. Crop. Res.* 121: 2–18.
  - 16 Cirilo, A.G., J. Dardanelli, M. Balzarini, F.H. Andrade, M. Cantarero, S. Luque, and H.M. Pedrol. 2009. Morpho-physiological traits associated with maize crop adaptations to environments differing in nitrogen availability. *F. Crop. Res.* 113(2): 116–124.
  - 17 Coque, M., and A. Gallais. 2007. Genetic variation among European maize varieties for nitrogen use efficiency under low and high nitrogen fertilization. *Maydica* 52: 383–397.
  - 18 Cui, C., J. Gao, X. Yu, Z. Wang, J. Sun, S. Hu, Z. Su, and M. Xie. 2013a. Dry matter accumulation and nitrogen migration of high-yielding spring maize for different nitrogen efficiency in the flowering and milking stages. *J. Plant Nutr. Fertil.* 19(6): 1337–1345.
  - 19 Cui, H., L. Jin, B. Li, S. Dong, P. Liu, B. Zhao, and J.-W. Zhang. 2013b. Effects of shading on dry matter accumulation and nutrient absorption of summer maize. *Chinese J. Appl. Ecol.* 24(11): 3099–3105.
  - 20 De Oliveira Silva, A. 2015. Evaluation of nitrogen use efficiency (NUE) in maize genotypes using in-season soil applications of isotopic nitrogen in field plots. M.S. Thesis. Purdue University.
  - 21 Di Fonzo, N., M. Motto, T. Maggiore, R. Sabatino, and F. Salamini. 1982. N-uptake, translocation and relationships among N-related traits in maize as affected by genotype. *Agronomie* 2(9): 789–796.
  - 22 Eghball, B., and J.W. Maranville. 1991. Interactive effects of water and nitrogen stresses on nitrogen utilization efficiency, leaf water status and yield of corn genotypes. *Commun. Soil Sci. Plant Anal.* 22(13-14): 1367–1382.
  - 23 Gentinetta, E., D. Cepl, C. Lepori, G. Perico, M. Motto, and F. Salamini. 1986. A major gene for delayed senescence in maize. Pattern of photosynthates accumulation and inheritance. *Plant Breed.* 97(3): 193–203.
  - 24 Goodroad, L.L., and M.D. Jellum. 1988. Effect of N fertilizer rate and soil pH on N efficiency in corn. *Plant Soil* 106: 85–89.
  - 25 Grzebisz, W., M. Wronska, J.B. Diatta, and P. Dullin. 2008. Effect of zinc foliar application at an early stage of maize growth on patterns of nutrients and dry matter accumulation by the canopy. Part II. Nitrogen uptake and dry matter accumulation patterns. *J. Elem.* 13(1): 29–39.
  - 26 Hanway, J.J. 1962a. Corn growth and composition in relation to soil fertility: I. Growth of different plant parts and relation between leaf weight and grain yield. *Agron. J.*

54: 145–148.

- Hanway, J.J. 1962b. Corn growth and composition in relation to soil fertility: II. Uptake of N, P, and K and their distribution in different plant parts during the growing season. *Agron. J.* 54: 217–222.
- 27 Hay, R.E., E.B. Earley, and E.E. Deturk. 1953. Concentration and translocation of nitrogen compounds in the corn plant (*Zea mays*) during grain development. *Plant Physiol.* 28(4): 606–621.
- 28 He, P., W. Zhou, and J. Jin. 2004. Carbon and nitrogen metabolism related to grain formation in two different senescent types of maize. *J. Plant Nutr.* 27(2): 295–311.
- 29 Hou, P., Q. Gao, R. Xie, S. Li, Q. Meng, E. a. Kirkby, V. Römheld, T. Müller, F. Zhang, Z. Cui, and X. Chen. 2012. Grain yields in relation to N requirement: Optimizing nitrogen management for spring maize grown in China. *F. Crop. Res.* 129: 1–6.
- 30 Jin, L.B., H.Y. Cui, B. Li, J.S. Yang, S.T. Dong, B. Zhao, P. Liu, and J.W. Zhang. 2013. Effects of integrated agronomic practices on nitrogen efficiency and soil nitrate nitrogen of summer maize. *Acta Agron. Sin.* 39(11): 2009–2015.
- 31 Jing, L.Q., F.C. Zhao, D.C. Wang, J.H. Yuan, D.L. Lu, and W.P. Lu. 2013. Effects of nitrogen application on accumulation and distribution of nitrogen, phosphorus, and potassium of summer maize under super-high yield conditions. *Acta Agron. Sin.* 39(8): 1478–1490.
- 32 Johnson, R.R., K.E. McClure, L.J. Johnson, E.W. Klosterman, and G.B. Triplett. 1966. Corn plant maturity. I. Changes in dry matter and protein distribution in corn plants. *Agron. J.* 58(2): 151–153.
- 33 Jones, W.J., J., and H.A. Huston. 1914. Composition of maize at various stages of its growth. *Indiana Agric. Exp. Stn. Bull.* 175.
- 34 Kamprath, E.J., R.H. Moll, and N. Rodriguez. 1982. Effects of nitrogen fertilization and recurrent selection on performance of hybrid populations of corn. *Agron. J.* 74: 955–958.
- 35 Karlen, D.L., E.J. Sadler, and C.R. Camp. 1987. Dry matter, nitrogen, phosphorus, and potassium accumulation rates by corn on norfolk loamy sand. *Agron. J.* 79: 649–656.
- 36 Karlen, D.L., R.L. Flannery, and E.J. Sadler. 1988. Aerial accumulation and partitioning of nutrients by corn. *Agron. J.* 80(2): 232.
- 37 Kosgey, J.R., D.J. Moot, a. L. Fletcher, and B. a. McKenzie. 2013. Dry matter accumulation and post-silking N economy of “stay-green” maize (*Zea mays* L.) hybrids. *Eur. J. Agron.* 51: 43–52.
- 38 Kovács, P. 2013. Systems evaluation of shallow anhydrous ammonia placements, rates, and timing on maize plant uniformity, yield, and N use efficiency. Ph.D. Dissertation. Purdue University.
- 39 Lafitte, H.R., and G.O. Edmeades. 1994a. Improvement for tolerance to low soil

- nitrogen in tropical maize II. Grain yield, biomass production, and N accumulation. *F. Crop. Res.* 39: 15–25.
- Lafitte, H.R., and G.O. Edmeades. 1994b. Improvement for tolerance to low soil nitrogen in tropical maize III. Variation in yield across environments. *F. Crop. Res.* 39(1): 27–38.
- 40 Lemcoff, J.H., and R.S. Loomis. 1994. Nitrogen and density influences on silk emergence, endosperm development, and grain yield in maize (*Zea mays* L.). *F. Crop. Res.* 38(2): 63–72.
- 41 Li, C.F., M. Zhao, P. Liu, J.W. Zhang, J.S. Yang, and S. Dong. 2014. Characteristics of grain filling and nitrogen translocation of maize parent lines released in different eras in China. *Acta Agron. Sin.* 40(11): 1990–1998.
- 42 Liu, J., A. Zhan, L. Bu, L. Zhu, S. Luo, X. Chen, Z. Cui, S. Li, R.L. Hill, and Y. Zhao. 2014. Understanding dry matter and nitrogen accumulation for high-yielding film-mulched maize. *Agron. J.* 106(2): 390–396.
- 43 Lü, P., J. Zhang, W. Liu, J. Yang, P. Liu, S. Dong, and D. Li. 2011. Effects of nitrogen application on yield and nitrogen use efficiency of summer maize in super-high yield conditions. *J. Plant Nutr. Fertil. Sci.* 17(5): 1099–1107.
- 44 Ma, B.L., and L.M. Dwyer. 1998. Nitrogen uptake and use of two contrasting maize hybrids differing in leaf senescence. *Plant Soil* 199: 283–291.
- 45 Martin, A., X. Belastegui-Macadam, I. Quilleré, M. Floriot, M.H. Valadier, B. Pommel, B. Andrieu, I. Donnison, and B. Hirel. 2005. Nitrogen management and senescence in two maize hybrids differing in the persistence of leaf greenness: Agronomic, physiological and molecular aspects. *New Phytol.* 167(2): 483–492.
- 46 Mi, G., J. Liu, F. Chen, F. Zhang, Z. Cui, and X. Liu. 2003. Nitrogen uptake and remobilization in maize hybrids differing in leaf senescence. *J. Plant Nutr.* 26(1): 237–247.
- 47 Miller, E. 2012. Nitrogen application timing and rate effects on nitrogen utilization of corn and the adoption of active optical reflectance sensors for nitrogen management. M.S. Thesis. Purdue University.
- 48 Moll, R.H., E.J. Kamprath, and W.A. Jackson. 1982. Analysis and interpretation of factors which contribute to efficiency of nitrogen utilization. *Agron. J.* 74(3): 562.
- 49 Moll, R.H., W.A. Jackson, and R.L. Mikkelsen. 1994. Recurrent selection for maize grain yield: Dry matter and nitrogen accumulation and partitioning changes. *Crop Sci.*: 874–881.
- 50 Montemurro, F., M. Maiorana, D. Ferri, and G. Convertini. 2006. Nitrogen indicators, uptake and utilization efficiency in a maize and barley rotation cropped at different levels and sources of N fertilization. *F. Crop. Res.* 99: 114–124.
- 51 Muchow, R.C. 1988a. Effect of nitrogen supply on the comparative productivity of maize and sorghum in a semi-arid tropical environment III. Grain yield and nitrogen

- accumulation. *F. Crop. Res.* 18: 31–43.
- Muchow, R.C. 1988b. Effect of nitrogen supply on the comparative productivity of maize and sorghum in a semi-arid tropical environment I. Leaf growth and leaf nitrogen. *F. Crop. Res.* 18: 1–16.
- 52 Ning, P., S. Li, P. Yu, Y. Zhang, and C. Li. 2013. Post-silking accumulation and partitioning of dry matter, nitrogen, phosphorus and potassium in maize varieties differing in leaf longevity. *F. Crop. Res.* 144: 19–27.
- 53 Oikeh, S.O., R.J. Carsky, J.G. Kling, V.O. Chude, and W.J. Horst. 2003. Differential N uptake by maize cultivars and soil nitrate dynamics under N fertilization in West Africa. *Agric. Ecosyst. Environ.* 100: 181–191.
- 54 Osaki, M. 1995. Comparison of productivity between tropical and temperate maize I. Leaf senescence and productivity in relation to nitrogen nutrition. *Soil Sci. Plant Nutr.* 41(3): 439–450.
- 55 Osaki, M., T. Shinano, and T. Tadano. 1991. Redistribution of carbon and nitrogen compounds from the shoot to the harvesting organs during maturation in field crops. *Soil Sci. Plant Nutr.* 37(1): 117–128.
- 56 Pan, W.L., E.J. Kamprath, R.H. Moll, and W.A. Jackson. 1984. Prolificacy in corn: Its effects on nitrate and ammonium uptake and utilization. *Soil Sci. Soc. Am. J.* 48(5): 1101.
- 57 Pan, W.L., J.J. Camberato, R.H. Moll, E.J. Kamprath, and W.A. Jackson. 1995. Altering source-sink relationships in prolific maize hybrids: Consequences for nitrogen uptake and remobilization. *Crop Sci.* 35(3): 836–845.
- 58 Peng, Y., J. Niu, Z. Peng, F. Zhang, and C. Li. 2010. Shoot growth potential drives N uptake in maize plants and correlates with root growth in the soil. *F. Crop. Res.* 115(1): 85–93.
- 59 Peng, Y., X. Li, and C. Li. 2012. Temporal and spatial profiling of root growth revealed novel response of maize roots under various nitrogen supplies in the field. *PLoS One* 7(5): e37726.
- 60 Pommel, B., A. Gallais, M. Coque, I. Quilleré, B. Hirel, J.L. Prioul, B. Andrieu, and M. Floriot. 2006. Carbon and nitrogen allocation and grain filling in three maize hybrids differing in leaf senescence. *Eur. J. Agron.* 24(3): 203–211.
- 61 Qi, W., X. Chen, P. Liu, G. Li, L. Shao, F. Wang, S. Dong, J. Zhang, and B. Zhao. 2013. Characteristics of dry matter, accumulation and distribution of N, P and K of super-high-yield summer maize. *J. Plant Nutr. Fertil. Sci.* 19(1): 26–36.
- 62 Rajcan, I., and M. Tollenaar. 1999a. Source : sink ratio and leaf senescence in maize: II. Nitrogen metabolism during grain filling. *F. Crop. Res.* 60: 255–265.
- Rajcan, I., and M. Tollenaar. 1999b. Source : sink ratio and leaf senescence in maize: I. Dry matter accumulation and partitioning during grain filling. *F. Crop. Res.* 60: 255–265.



- 63 Reed, A. J., F.E. Below, and R.H. Hageman. 1980. Grain protein accumulation and the relationship between leaf nitrate reductase and protease activities during grain development in maize (*Zea mays* L.): I. Variation between genotypes. *Plant Physiol.* 66: 164–170.
- 64 Ren, B., J. Zhang, X. Li, X. Fan, S. Dong, P. Liu, and B. Zhao. 2014. Effect of waterlogging on nutrient uptake and transport of summer maize. *J. Plant Nutr. Fertil. Sci.* 20(2): 298–308.
- 65 Sayre, J.D. 1948. Mineral Accumulation in Corn. *Plant Physiol.* 23(3): 267–281.
- 66 Subedi, K.D., and B.L. Ma. 2007. Dry matter and nitrogen partitioning patterns in Bt and non-Bt near-isoline maize hybrids. *Crop Sci.* 47: 1186–1192.
- 67 Swank, J.C., F.E. Below, R.J. Lambert, and R.H. Hageman. 1982. Interaction of carbon and nitrogen metabolism in the productivity of maize. *Plant Physiol.* 70: 1185–1190.
- 68 Ta, C.T., and R.T. Weiland. 1992. Nitrogen partitioning in maize during ear development. *Crop Sci.* 32(2): 443.
- 69 Tsai, C.L., and C.Y. Tsai. 1990. Endosperm modified by cross-pollinating maize to induce changes in dry matter and nitrogen accumulation. *Crop Sci.* 30(4): 804–808.
- 70 Tsai, C.Y., D.M. Huber, D. V. Glover, and H.L. Warren. 1984. Relationship of N deposition to grain yield and N response of three maize hybrids. *Crop Sci.* 24: 277–281.
- 71 Tsai, C., D.M. Huber, H.L. Warren, and C.Y. Tsai. 1991. Effects of cross-pollination on dry matter accumulation, nutrient partitioning and grain yield of maize hybrids grown under different levels of N fertility. *J. Sci. Food Agric.* 57: 163–174.
- 72 Uribe Larrea, M., S.P. Moose, and F.E. Below. 2007. Divergent selection for grain protein affects nitrogen use in maize hybrids. *F. Crop. Res.* 100(1): 82–90.
- 73 Wang, X., Y. Cao, W. Wei, L. Zhang, Y. Wang, S. Bian, and L. Wang. 2012. Characteristics of dry matter production and nitrogen use efficiency of 37 spring maize hybrids with high-yielding potential in north of China. *J. Plant Nutr. Fertil. Sci.* 18(1): 60–68.
- 74 Wang, Y.L., C.H. Li, J.F. Tan, X. Zhang, and T.X. Liu. 2011. Effect of postponing N application on yield, nitrogen absorption and utilization in super-high-yield summer maize. *Acta Agron. Sin.* 37(2): 339–347.
- 75 Wang, Z., J. Gao, and B.L. Ma. 2014. Concurrent improvement in maize yield and nitrogen use efficiency with integrated agronomic management strategies. *Agron. J.* 106: 1243–1250.
- 76 Wang, Z., J. Li, and Y. Li. 2014. Effects of drip system uniformity and nitrogen application rate on yield and nitrogen balance of spring maize in the North China Plain. *F. Crop. Res.* 159: 10–20.
- 77 Wolfe, D.W., D.W. Henderson, T.C. Hsiao, and A. Alvino. 1988. Interactive water and

nitrogen effects on senescence of maize. I. Leaf area duration, nitrogen distribution, and yield. *Agron. J.* 80: 859–864.

- 78 Worku, M., M. Bänziger, G.S.A. Erley, D. Friesen, A.O. Diallo, and W.J. Horst. 2007. Nitrogen uptake and utilization in contrasting nitrogen efficient tropical maize hybrids. *Crop Sci.* 47(2): 519–528.
- 79 Xiao, Q., L. Yan, X. Zhu, H. Zhang, B. Cao, X. Ni, L. Li, J. Yang, D. Huang, and W. Yi. 2014. Dynamic analysis of dry matter and NPK accumulation with time in summer maize. *J. Plant Nutr. Fertil. Sci.* 20(3): 606–612.
- 80 Yan, P., S. Yue, M. Qiu, X. Chen, Z. Cui, and F. Chen. 2014. Using maize hybrids and in-season nitrogen management to improve grain yield and grain nitrogen concentrations. *F. Crop. Res.* 166: 38–45.
- 81 Yibirin, H., J.W. Johnson, and D. Eckert. 1996. Corn production as affected by daily fertilization with ammonium, nitrate, and phosphorus. *Soil Sci. Soc. Am. J.* 60: 512–518.
- 82 Zhan, X., T. Li, X. Han, D. Zou, R. Zou, and B. Ye. 2011. Effects of nitrogen fertilization methods on yield, profit and nitrogen absorption and utilization of spring maize. *J. Plant Nutr. Fertil. Sci.* 17(4): 861–868.
- 83 Zhao, B., S.T. Dong, J.W. Zhang, and P. Liu. 2010. Effects of controlled-release fertilizer on yield and nitrogen accumulation and distribution in summer maize. *Acta Agron. Sin.* 36(10): 1760–1768.
- 84 Zhao, B., S.-T. Dong, J.-W. Zhang, and P. Liu. 2010. Effects of Controlled-Release Fertilizer on Yield and Nitrogen Accumulation and Distribution in Summer Maize. *Acta Agron. Sin.* 36(10): 1760–1768.
